# Supplementary material
Source: PubMed Central journal article supplement (PMC7925173)
Supplement: JVI.01542-20-s0005.pdf [file JVI.01542-20-s0005.pdf]

## **Supporting information**

**Table S1. Mass spectrometry analysis of  $\Delta 45$ -CP capsids.**

**Table S2. Mass spectrometry analysis of CP capsids.**

**Movie S1. N-terminus conformations of A and B subunits in hPBV Ht-CP, CP,  $\Delta 45$ -CP capsids.**

**Movie S2. Proposed assembly pathway for the 60-dimer hPBV capsid.**
